# Supplementary material
Source: publisher figshare collection journal article supplement (https://acs.figshare.com/ndownloader/files/12176984)
Supplement: Supplementary file 1 [file 12176984]

**Permission Request Form for Use of Individual and/or Group Photos  
in ACS LiveSlides from Copyright Owners/Publishers/Photographers  
Other Than ACS**

Date: June 19, 2018

To: GOPAL R. IYER, +919619442332  
Publisher's/Copyright Owner's Contact Information  
Email: gopalr.iyer.met15@iitbhu.ac.in  
\_\_\_\_\_  
\_\_\_\_\_  
\_\_\_\_\_  
Publisher's/Copyright Owner's Email Address

From: BALASUBRAMANIAN S  
Your Name and Complete Mailing Address  
JNCASR  
BANGALORE 560064  
INDIA  
91-80-22082808  
Your Phone Number Including Country and City Codes  
JNCASR @ GMAIL.COM  
Your Email Address  
\_\_\_\_\_  
Your Specific Deadline Date

I am preparing an ACS LiveSlides entitled:

Charge Environment and Hydrogen Bond dynamics in Binary Ionic  
to appear with Liquid mixtures: A computational study  
DOI: 10.1021/acs.jpcclett.8b01481  
\_\_\_\_\_  
Title of ACS Publication and DOI

which is published by the American Chemical Society, a not-for-profit membership society and a STM signatory.

I would appreciate your permission to use the following material in all formats including but not limited to print, microform, electronic, and/or CD-ROM from the following reference:

**Individual Photographs of the Following Individuals:**

NIKHIL AVULA, ANIRBAN MONDAL & SUNDARAM BALASUBRAMANIAN  
\_\_\_\_\_  
\_\_\_\_\_

**Collective Photograph (s) representing the following groups:**

\_\_\_\_\_  
\_\_\_\_\_  
\_\_\_\_\_

If you, the photographer, have a required **credit line**, please include it below:

N/A  
\_\_\_\_\_  
\_\_\_\_\_

For your convenience, you may sign and date the bottom of this letter to indicate your agreement. Please return this form to me at the above email address, by the above **deadline date** (if given above). Thank you.

Agreed:

  
Publisher's/Copyright Owner's Signature or Stamp

Date:

19 Jun, 2018

Date

**SIGN HERE**

Submit completed and signed form with your signed ACS LiveSlides Video Release.

7/25/16
