# Supplementary material
Source: publisher figshare collection journal article supplement (https://acs.figshare.com/ndownloader/files/12176984)
Supplement: Supplementary file 2 [file 12176984]

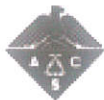

## AMERICAN CHEMICAL SOCIETY

### MODEL RELEASE FORM for ACS LiveSlides (Person in Photograph)

This form cannot be altered. For questions, please contact [ACSPubsMultimedia@acs.org](mailto:ACSPubsMultimedia@acs.org)

#### Requesting Permission:

Date: 15-06-2018

To: Nikhil V.S. Arula.  
Jawaharlal Nehru Centre  
for Advanced Scientific  
Research, Bangalore,  
India.

Return to: American Chemical  
Society.

I am preparing material for

Charge Environment and Hydrogen Bond Dynamics in  
Binary Ionic Liquid Mixtures: A Computational Study.  
(title of ACS LifeSlide)

to be published by the American Chemical Society, a not-for-profit membership society.

I would like your permission to include the enclosed photograph(s) in which you appear. To indicate your permission, please sign and date the statement below and return this form to me.

I appreciate your prompt response.

Signed: Avs Nikhil

#### Grant of Permission:

I hereby grant to the American Chemical Society royalty-free permission, including nonexclusive world rights in all languages, to reproduce in all formats including but not limited to print, microform, electronic, and/or CD-ROM, to reproduce and include my likeness as shown in the attached photocopy(ies) of photograph(s) for the above-mentioned publication.

Agree to and accepted:

Signature Avs Nikhil Date: 15-06-2018

**SIGN HERE**

Check one of the blanks:

☒ I am the person in the photo

☐ I am the authorized agent for the person in the photo (for group photographs, one person, in the photograph, needs to sign on behalf of the group)

Submit completed and signed form with your signed ACS Journals LifeSlides Video Release.

7/19/16

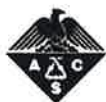

## AMERICAN CHEMICAL SOCIETY

### MODEL RELEASE FORM for ACS LiveSlides (Person in Photograph)

This form cannot be altered. For questions, please contact [ACSPubsMultimedia@acs.org](mailto:ACSPubsMultimedia@acs.org)

#### Requesting Permission:

Date: 15-06-2018

To: Anirban Mandal  
Max Planck Institute for  
Polymer Research  
Mainz, Germany

Return to: American Chemical  
Society

I am preparing material for

Charge Environment and Hydrogen Bond Dynamics in Binary Ionic  
Liquid Mixtures: A Computational study  
(title of ACS LifeSlide)

to be published by the American Chemical Society, a not-for-profit membership society.

I would like your permission to include the enclosed photograph(s) in which you appear. To indicate your permission, please sign and date the statement below and return this form to me.

I appreciate your prompt response.

Signed: 

#### Grant of Permission:

I hereby grant to the American Chemical Society royalty-free permission, including nonexclusive world rights in all languages, to reproduce in all formats including but not limited to print, microform, electronic, and/or CD-ROM, to reproduce and include my likeness as shown in the attached photocopy(ies) of photograph(s) for the above-mentioned publication.

Agree to and accepted:

Signature  Date: 15-06-2018

Check one of the blanks:

☒ I am the person in the photo

☐ I am the authorized agent for the person in the photo (for group photographs, one person, in the photograph, needs to sign on behalf of the group)

Submit completed and signed form with your signed ACS Journals LifeSlides Video Release.

**SIGN HERE**

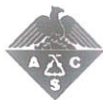

## AMERICAN CHEMICAL SOCIETY

### MODEL RELEASE FORM for ACS LiveSlides (Person in Photograph)

This form cannot be altered. For questions, please contact [ACSPubsMultimedia@acs.org](mailto:ACSPubsMultimedia@acs.org)

#### Requesting Permission:

Date: 16-06-2018

To: Sundaram Balasubramanian  
Jawahar Lal Nehru Centre  
for Advanced Scientific Research,  
Bangalore, India.

Return to: American Chemical  
Society.

I am preparing material for

Charge Environment and Hydrogen bond Dynamics in

Binary Ionic Liquid Mixtures: A Computational Study.  
(title of ACS LifeSlide)  
to be published by the American Chemical Society, a not-for-profit membership society.

I would like your permission to include the enclosed photograph(s) in which you appear. To indicate your permission, please sign and date the statement below and return this form to me.

I appreciate your prompt response.

Signed: [Signature]

#### Grant of Permission:

I hereby grant to the American Chemical Society royalty-free permission, including nonexclusive world rights in all languages, to reproduce in all formats including but not limited to print, microform, electronic, and/or CD-ROM, to reproduce and include my likeness as shown in the attached photocopy(ies) of photograph(s) for the above-mentioned publication.

Agree to and accepted:

Signature [Signature] Date: 16-06-2018

**SIGN HERE**

Check one of the blanks:

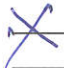

I am the person in the photo

I am the authorized agent for the person in the photo (for group photographs, one person, in the photograph, needs to sign on behalf of the group)

Submit completed and signed form with your signed ACS Journals LifeSlides Video Release.

7/19/16
